# Supplementary material
Source: PubMed Central journal article supplement (PMC4175907)
Supplement: NIHMS624513-supplement-supplement_1.pdf [file NIHMS624513-supplement-supplement_1.pdf]

615 **SUPPLEMENTARY DATA**

616

617 Table S. Dry weight concentrations of Pb, Cd, Ba and Al in vegetables sampled from urban gardens in  
618 NYC and Buffalo, NY.

| Metal | Veg type | Measured Values   |                    |                     |      |     |
|-------|----------|-------------------|--------------------|---------------------|------|-----|
|       |          | Mean <sup>a</sup> | Min                | Median <sup>a</sup> | Max  | %ND |
| Pb    | Fruit    | 0.27              | 0.038 <sup>b</sup> | 0.14                | 1.9  | 46% |
|       | Leafy    | 1.3               | 0.17 <sup>b</sup>  | 0.74                | 9.3  | 7%  |
|       | Herb     | 3.8               | 0.73               | 2.1                 | 18   | 0%  |
|       | Root     | 1.8               | 0.16 <sup>b</sup>  | 0.68                | 16   | 9%  |
| Cd    | Fruit    | 0.19              | 0.02 <sup>b</sup>  | < 0.25              | 3.5  | 81% |
|       | Leafy    | 0.35              | < 0.25             | 0.27                | 2.5  | 40% |
|       | Herb     | 0.21              | < 0.25             | < 0.25              | 0.58 | 75% |
|       | Root     | 0.19              | 0.11 <sup>b</sup>  | < 0.25              | 0.58 | 63% |
| Ba    | Fruit    | 3.2               | 0.39               | 1.8                 | 20   | 0%  |
|       | Leafy    | 47                | 6.1                | 33                  | 280  | 0%  |
|       | Herb     | 40                | 5.0                | 38                  | 120  | 0%  |
|       | Root     | 22                | 1.9                | 23                  | 70   | 0%  |
| Al    | Fruit    | 4.5               | 1.2                | 3.4                 | 28   | 0%  |
|       | Leafy    | 32                | 2.8                | 15                  | 200  | 0%  |
|       | Herb     | 45                | 9.5                | 25                  | 330  | 0%  |
|       | Root     | 8.5               | 2.8                | 6.1                 | 29   | 0%  |

619 All concentrations are reported in mg kg<sup>-1</sup>d.w. Sample sizes for each category: fruit (80), leafy (67),  
620 herb (16), and root (32). <sup>a</sup>Results below the detection limit were considered equal to half the detection  
621 limit in determining mean and median values. <sup>b</sup>Minimum detected concentration. Some samples in  
622 which Pb and/or Cd were not detected had a detection limit higher than this concentration. The higher  
623 detection limits, reported by a commercial laboratory, were 0.1 or 0.6 mg kg<sup>-1</sup> d.w. for Pb and 0.25 mg  
624 kg<sup>-1</sup> d.w. for Cd.

625

626
